# Supplementary material for: A Ti-coated nano-SiC supported platinum electrocatalyst for improved activity and durability in direct methanol fuel cells
Source: Royal Society of Chemistry journal article supplement (doi:10.1039/c4ta00618f), 2014-01-01
Supplement: c4ta00618f1.pdf [file c4ta00618f1.pdf]

## Supporting Information

### **Ti-coated nano-SiC supported platinum electrocatalyst for improved activity and durability in direct methanol fuel cells**

Yan Zhang, Jianbing Zang, Liang Dong, Xiaozhe Cheng, Yuling Zhao, Yanhui Wang\*

State Key Laboratory of Metastable Materials Science and Technology, College of Materials Science and Engineering, Yanshan University, Qinhuangdao 066004, PR China

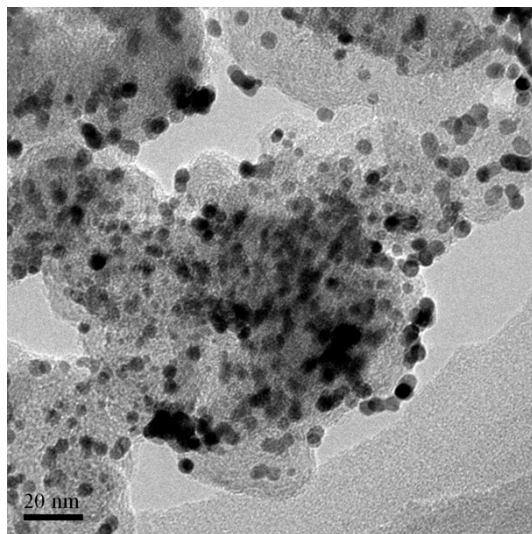

Fig. S1. TEM image of Pt/C electrocatalyst with 32.02 wt% Pt mass percentage prepared with microwave-assisted reduction method.

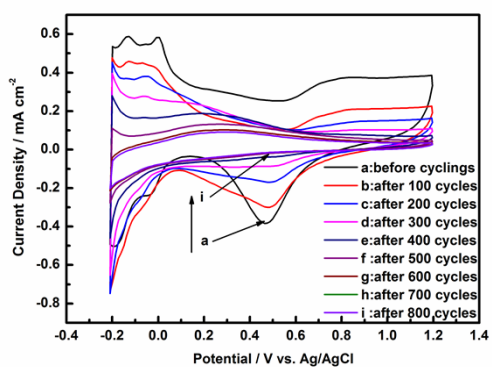

Fig. S2. CV curve of 32.02 wt% Pt/SiC electrocatalyst recorded in 0.5 M H<sub>2</sub>SO<sub>4</sub> between -0.2 and +1.2 V (vs. Ag/AgCl) with a 50 mV s<sup>-1</sup> sweep rate at room temperature, the currents were normalized by the geometric electrode area (0.19 cm<sup>2</sup>)

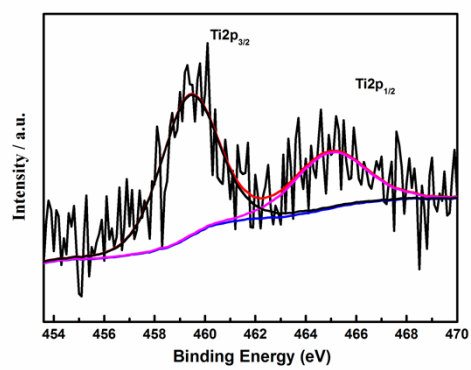

Fig. S3. Ti (2p) regions of the XPS spectra of Pt-Ti/SiC after the ADT test.
